# Supplementary material for: Extracellular matrix stiffness and cell contractility control RNA localization to promote cell migration
Source: PubMed Central journal article supplement (PMC5638855; doi:10.1038/s41467-017-00884-y), 2017-10-12
Supplement: 41467_2017_884_MOESM3_ESM.pdf [file 41467_2017_884_MOESM3_ESM.pdf]

## Description of Additional Supplementary Files

File Name: Supplementary Data 1

Description: **RNA-Seq data of control and APC-knockdown cells.** Table lists all identified RNAs in protrusions and cell bodies together with associated fold changes and p-values. Additional sheets list RNAs within specific groups and associated cutoffs.

File Name: Supplementary Data 2

Description: **Ingenuity Pathway Analysis (IPA) results**

File Name: Supplementary Data 3

Description: **RNA-Seq data of HBB and Pkp4 cUTR-expressing cells.** Table lists all identified RNAs in protrusions and cell bodies together with associated fold changes and p-values. Additional sheets list RNAs within specific groups and associated cutoffs.
